# Supplementary material for: Macroalga Ulva prolifera O.F. Müller: an efficient biofilter for nitrogen-enriched aquaculture effluents
Source: Frontiers journal article supplement (doi:10.3389/fmars.2025.1654677), 2025-08-15
Supplement: Table_1.docx [file Table_1.docx]

Supplemental Information

**Table S1.** Molecular identification results of *Ulva prolifera*.

| **Gene name** | **Gene sequence** | **Species identification results based on sequence alignment in the NCBI database** |
| --- | --- | --- |
| ITS | TGGAAGCCTCACCTGAAACTCAGGTCGAATGAATGGATTGGTATCCTTTCGGGCCCACAGCACGCGACACCGAGCCACCGCCTAGAAGTAGCGAGCTACCTACCTAGTCGGGGCCACGAATGGGCCGCGCACGAGCCTCTGCATTTCAGCCGGCCCGGGCGCCGAGGCGTCCGGGGGGGCCAGGTCCACGCGGGGGTGCGTGAGGGGGTATTCCGACGCTGAGGCAGATGTGGTCTCCTCCGAAGAGTCGACCGGCAATGTGCGTTCAAAGATTCGATGACTCACGGAATTCTGCAATTCACACTACGTATCGCATTTCGCTGCGTTCTTCATCGTTGCGAGAGCCAAGATATCCGTTGTTGAGAGTTGTCTCAGTTACTATCGCAGGGGTGTCCCCGTGCGAAGCTGCTTCAGGGCAGAGGGTTCAATGGGTTAGGGCTCCGGCCCGGCGCGGTCGCCCCCCGAGGGGAGCTCACGCGCCGGCGGATCCTGTAAACGGCGGGCCCTCGCCCCCCGAGGGGAGCGAGCGCC | LPP |
| 5S | TGTTGGGCAGGATTAGTACTGGGCTGAGTGATCTCCTGGGAATCCCCTGTGCTGTATCGCCAACAAACCCCTTTTGGGGCTGCCTTACCCTCTGCATCTGTGTATCGCGGCCGCGTACGAGCCTGTACGCCTGCGCGCGCTTCGAGCCGCACATACACAAGCAGCCGTCGGCGCTGTGCCCAGGTCTCCAGTGCCCCCCCGCGCCCGGCCCGCACGCTCACCTCTCTGTCCTGTCTCTGCTCGCATCACGTCTCCGTCCCACTCGCCGCGGCTCCTTACCGTCGGCGGCCAGGCCCTCGCCTGCCTCCAATCACTGCCAGACCATTCCCCCGCAATGCCCCTTCGTCCGGGCGCGCTCATAGCCTCGACTTCCGCTGCATCTGGCGTGATACGGTCATACCACCAGAAAAAAACGTAT | *Ulva prolifera* |

**Note:** The full name of the ITS gene is Internal Transcribed Spacer.
